# Supplementary material for: The synergistic effect of oxygen-containing functional groups on CO2 adsorption by the glucose–potassium citrate-derived activated carbon
Source: Royal Society of Chemistry journal article supplement (doi:10.1039/c8ra05523h), 2018-01-01
Supplement: c8ra05523h1.pdf [file c8ra05523h1.pdf]

**Electronic Supplementary Information**

**The synergistic effect of oxygen functional groups on  
CO<sub>2</sub> adsorption by the glucose-potassium citrate  
derived activated carbon**

Baogen Liu<sup>a</sup>, Haoyang Li<sup>b</sup>, Xianchen, Ma<sup>a</sup>, Ruofei Chen<sup>a,c</sup>, Shaobin Wang<sup>c</sup>,  
Liqing Li<sup>a,\*</sup>

<sup>a</sup> *School of Energy Science and Engineering, Central South University, Changsha  
410083, China*

<sup>b</sup> *School of material Science and Engineering, Central South University, Changsha  
410083, China*

<sup>c</sup> *Department of Chemical Engineering, Curtin University, GPO Box U1987, Perth,  
Australia*

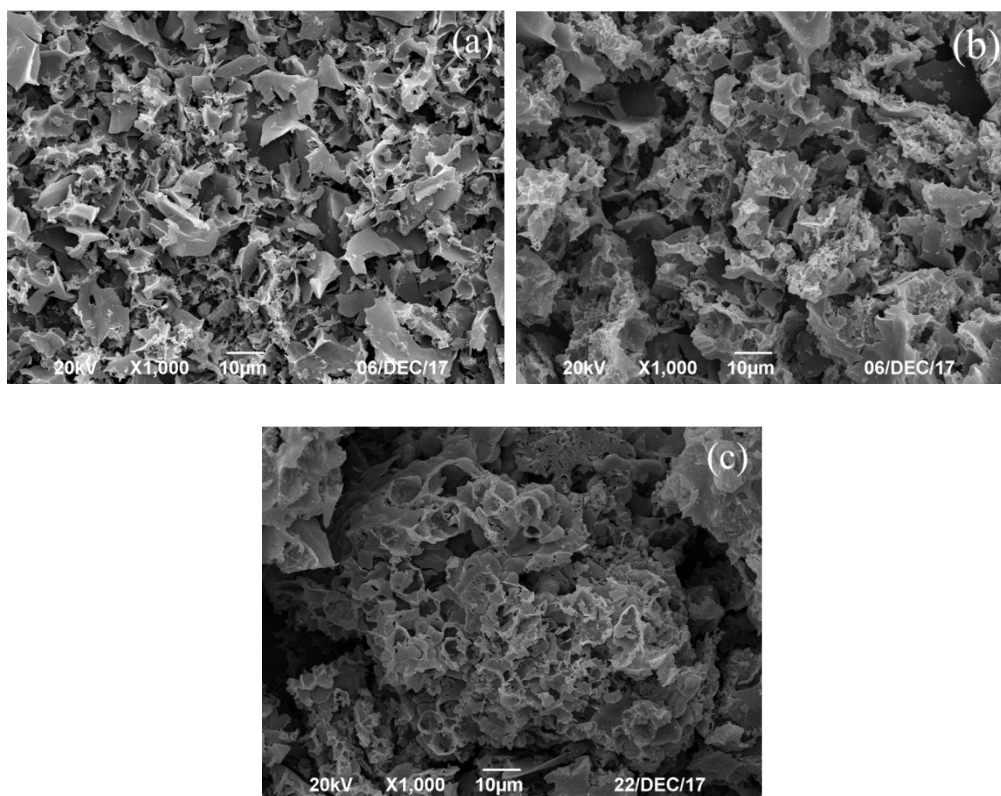

Figure S1 SEM images of: (a) KGC-750, (b) PGC-750, (c) PGC-900

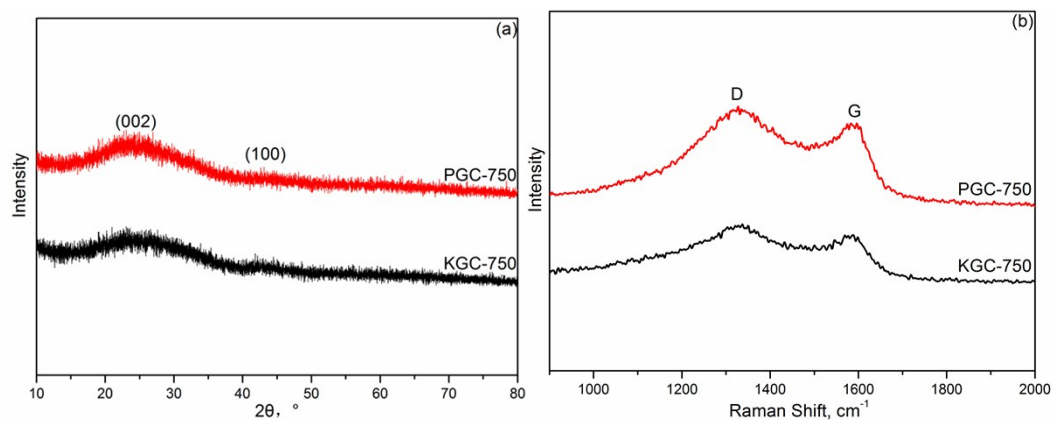

Figure S2 (a) XRD patterns and (b) Raman spectra of KGC-750 and PGC-750

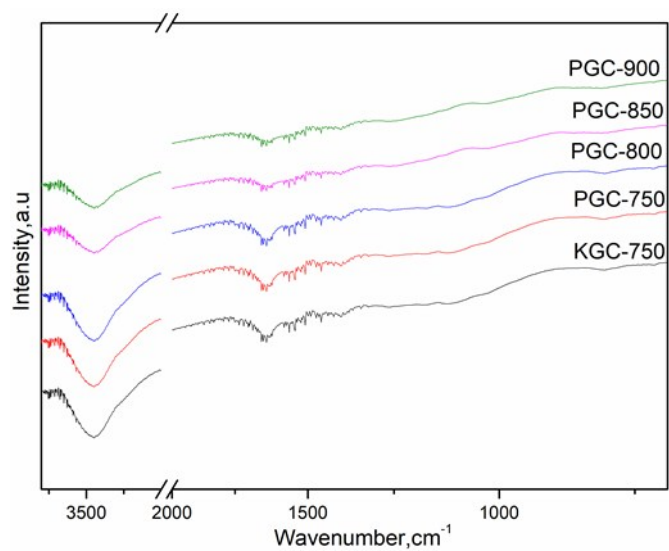

Figure S3 FTIR spectra of as-prepared activated carbons

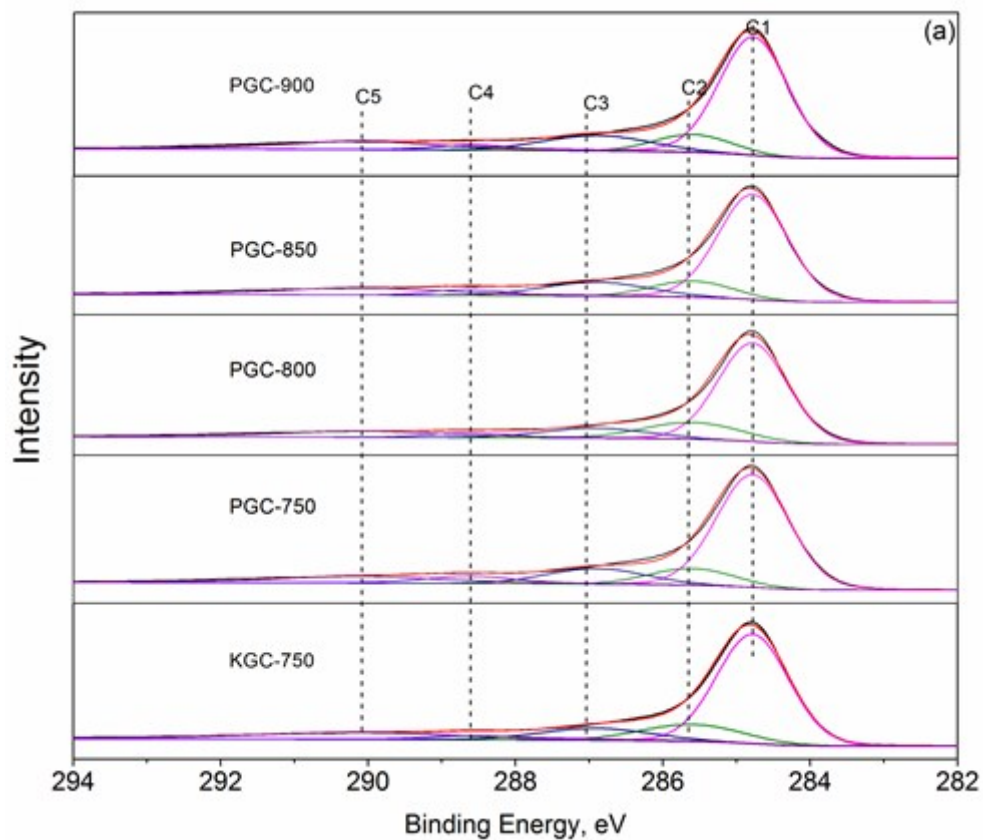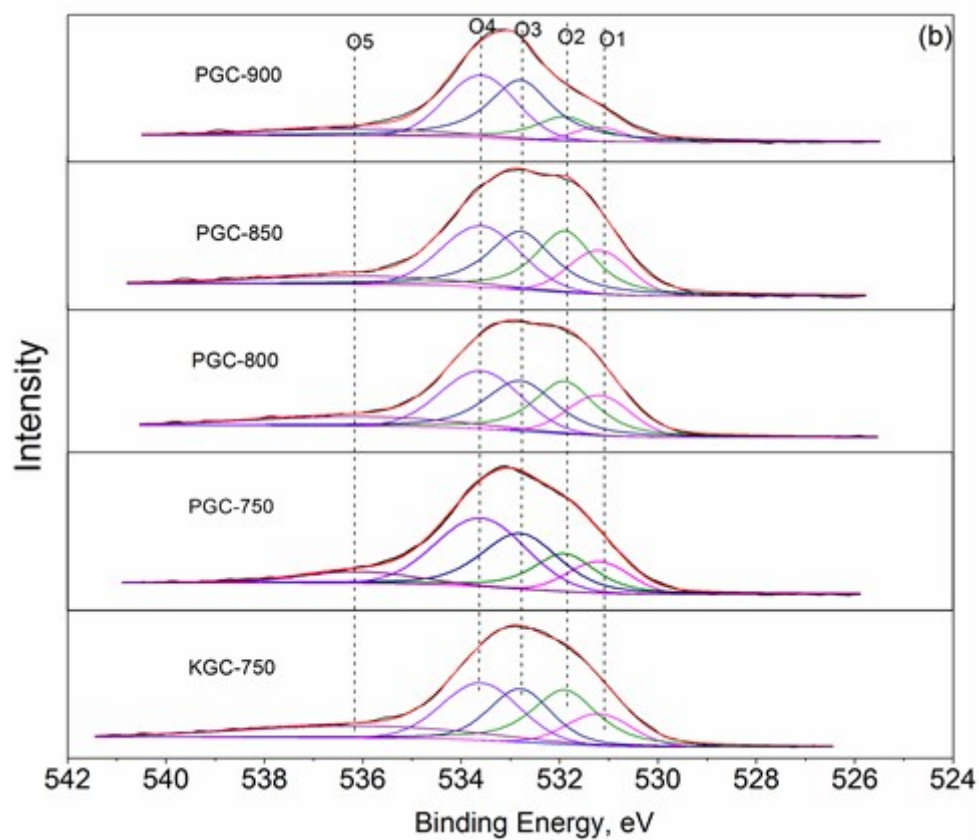

Figure S4. XPS spectra of as-prepared samples (a) C1s and (b) O1s

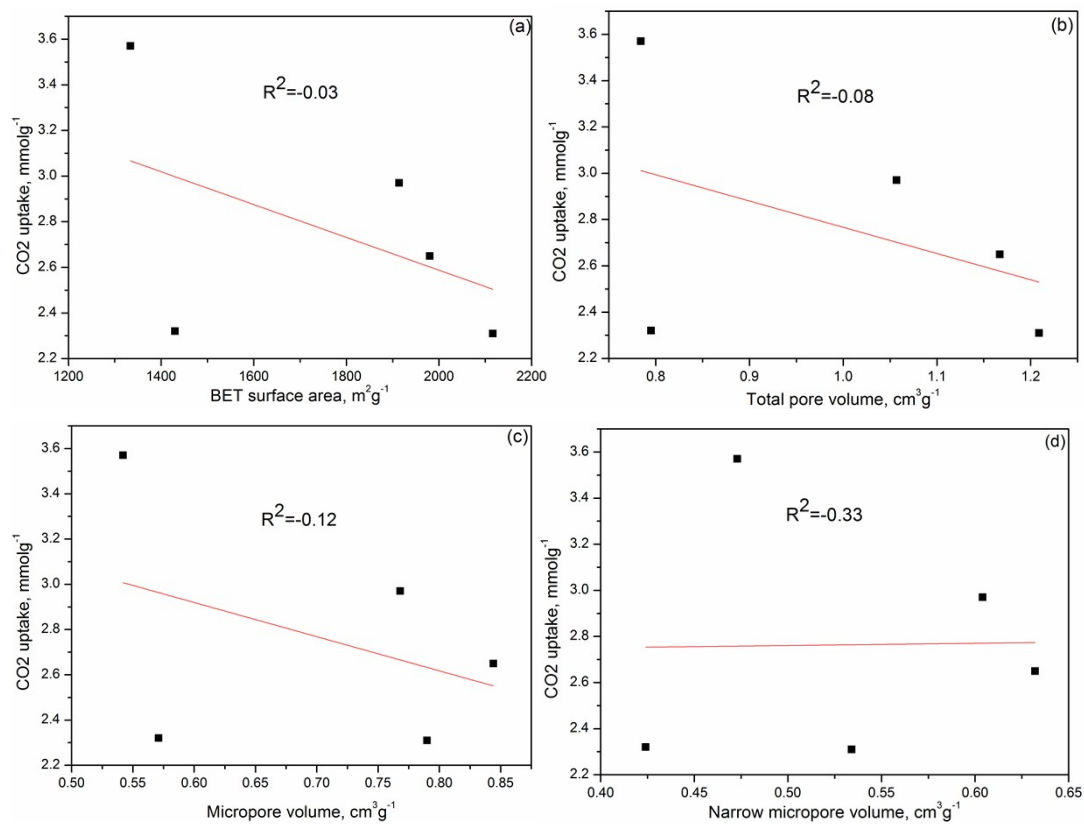

Figure S5 Relationship between CO<sub>2</sub> uptake at 25 °C and textural properties of prepared KC sample: (a) BET surface area (b) total pore volume (c) micropore volume and (d) narrow micropore volume
